# Supplementary material for: The strategy for Co2(CO)8-catalyzed double carbonylative [2 + 2 + 1] cycloaddition or [2 + 2 + 2] cycloaddition reaction of triynes: a new synthetic method for tetracyclic compounds †
Source: Royal Society of Chemistry journal article supplement (doi:10.1039/a909605a), 2000-01-01
Supplement: a909605a.doc [file a909605a.doc]

**Supplementary data**

**The strategy for Co2(CO)8-catalyzeddouble carbonylative [2+2+1] cycloaddition or [2+2+2] cycloaddition reaction of triynes: a new synthetic method for tetracyclic compounds**

**Seung Uk Son, Se-Jung Paik, Sang Ick Lee and Young Keun Chung***

*Department of Chemistry and Center for Molecular Catalysis, College of Natural Sciences, Soul National University, Seoul 151-742, Korea*

**Characterization of New Compounds**

**Substrate in entry 1.** 1H NMR (CDCl3, 300 MHz):  4.24 (s, 4 H), 4.22 (s, 4 H), 0.87 (s, 18 H), 0.05 (s, 12 H) ppm; 13C NMR (CDCl3, 75 MHz):  100.9, 90.2, 81.9, 57.1, 63.3, 25.9, 16.3, -4.8 ppm; HRMS calcd for (M+1)+ *m*/*z* 391.2489, found *m*/*z* 391.2494.

**Substrate in entry 2.** 1H NMR (CDCl3, 300 MHz):  4.30 (s, 4 H), 4.25 (s, 4 H), 0.19 (s, 18 H) ppm; 13C NMR (C6D6, 75 MHz):  100.4, 91.8, 81.9, 57.1, 56.4, -0.4 ppm; HRMS calcd for (M + 1) + *m*/*z* 307.1550, found *m*/*z* 307.1563.

**Substrate in entry 4.** 1H NMR (CDCl3, 300 MHz):  4.24 (q, *J* 7.1, 4 H), 4.22 (m, 4 H), 3.04 (m, 2 H), 2.97 (m, 2 H), 2.44 (m, 1 H), 2.02 (m, 1 H), 1.26 (t, *J* 7.1, 6 H) ppm; 13C NMR (CDCl3, 75 MHz):  168.6, 81.5, 78.8, 78.4, 76.3, 74.8, 71.7, 62.0, 56.6, 56.2, 56.0, 22.8, 22.5, 13.9 ppm; HRMS calcd for (M+1)+ *m*/*z* 305.1389, found *m*/*z* 305.1387.

**Substrate in entry 5.** 1H NMR (CDCl3, 300 MHz):  2.92 (s, 4 H), 2.87 (d, *J* 2.6, 4 H), 2.13 (s, 12 H), 2.04 (t, *J* 2.6, 2 H) ppm; 13C NMR (CDCl3, 75 MHz):  202.6, 78.7, 72.1, 69.8, 26.2, 21.2, 20.8 ppm; HRMS calcd for (M+1)+ *m*/*z* 327.1596, found *m*/*z* 327.1592.

**Compound 1A.** 1H NMR (CDCl3, 300 MHz):  5.21 (s, 4 H), 4.95 (s, 4 H), 0.92 (s, 18 H), 0.43 (s, 12 H) ppm; 13C NMR (C6D6, 75 MHz):  146.8, 138.5, 132.1, 76.3, 71.2, 29.2, 18.5, 3.1 ppm; HRMS calcd for (M+1)+ *m*/*z* 391.2489, found *m*/*z* 391.2497.

**Compound 2A.** 1H NMR (CDCl3, 300 MHz):  5.17 (s, 4 H), 4.96 (s, 4 H), 0.40 (s, 18 H) ppm; 13C NMR (C6D6, 75 MHz):  146.2, 138.4, 133.1, 75.1, 71.1, 3.6 ppm; HRMS calcd for (M)+ *m*/*z* 306.1471, found *m*/*z* 306.1468.

**Compound 3C.** 1H NMR (C6D6, 300 MHz):  6.70 (s, 1 H), 6.65 (s, 1 H), 4.60 (m, 2 H), 4.24 (m, 2 H), 3.14 (s, 2 H), 2.59 (s, 2 H) ppm; 13C NMR (C6D6, 75 MHz):  200.8, 139.7, 128.9, 126.8, 124.4, 118.3, 116.5, 78.9, 76.6, 42.8, 39.9 ppm; Anal. Calcd. for C11H10O3: C, 69.46; H, 5.30. Found: C, 69.63; H, 5.01.

**Compound 4A.** 1H NMR (C6D6, 300 MHz):  6.86 (d, *J* 6.6, 1 H), 6.68 (d, *J* 6.7, 1 H), 4.90 (s, 2 H), 4.82 (s, 2 H), 3.93 (m, 4 H), 3.71 (s, 2 H), 3.45 (s, 2 H), 0.89 (m, 6 H) ppm; 13C NMR (C6D6, 75 MHz):  171.4, 139.6, 135.7, 133.5, 123.3, 119.7, 73.6, 72.3, 61.9, 61.0, 40.6, 39.1, 14.0 ppm; HRMS calcd for (M+1)+ *m*/*z* 305.1399, found *m*/*z* 305.1390.

**Compound 4B.** 1H NMR (C6D6, 300 MHz):  5.25 (s, 1 H), 5.11 (s, 1 H), 4.51 (d, *J* 15.0, 1 H), 4.10 (m, 2 H), 3.99 (d, *J* 8.2, 1 H), 3.95 (d, *J* 15.0, 1 H), 3.81 (m, 2 H), 3.78 (d, *J* 17.0, 1 H), 3.47 (d, *J* 8.5, 1 H), 2.98 (d, *J* 17.0, 1 H), 2.59 (d, *J* 14.0, 1 H), 2.37 (d, *J* 14.0, 1 H), 1.01 (t, *J* 7.1, 3 H), 0.80 (t, *J* 7.1, 3 H) ppm; 13C NMR (C6D6, 75 MHz):  204.3, 202.2, 179.2, 178.5, 171.3, 169.5, 126.1, 121.3, 120.0, 69.6, 68.6, 67.5, 65.8, 62.1, 61.4, 36.8, 35.3, 14.0, 13.8 ppm; HRMS calcd for (M+1)+ *m*/*z* 361.1287, found *m*/*z* 361.1277.

**Compound 5A.** 1H NMR (C6D6, 300 MHz):  6.83 (s, 2 H), 3.24 (s, 4 H), 3.16 (s, 4 H), 1.77 (s, 12 H) ppm; 13C NMR (C6D6, 75 MHz):  203.8, 139.1, 136.3, 123.3, 75.0, 37.5, 36.0, 26.0 ppm; HRMS calcd for (M)+ *m*/*z* 326.1518, found *m*/*z* 326.1511.

**Compound 5B.** 1H NMR (C6D6, 300 MHz):  5.15 (d, *J* 1.9, 2 H), 3.36 (dd, *J* 17.0, 2.2, 2 H), 2.75 (d, *J* 17.0, 2 H), 2.42 (d, *J* 14.0, 2 H), 2.23 (d, *J* 14.0, 2 H), 1.86 (s, 6 H), 1.64 (s, 6 H) ppm; 13C NMR (C6D6, 75 MHz):  204.5, 201.9, 120.6, 76.5, 68.6, 33.4, 32.8, 26.2, 25.2 ppm; HRMS calcd for (M+1)+ *m*/*z* 383.1495, found *m*/*z* 383.1497.

**Compound 6B.** 1H NMR (C6D6, 300 MHz):  5.25 (s, 2 H), 4.09 (d, *J* 11.0, 2 H), 3.93 (d, *J* 11.0, 2 H), 3.17 (s, 4 H), 2.67 (d, *J* 16.0, 2 H), 2.36 (d, *J* 16.0, 2 H), 1.52 (d, *J* 14.0, 2 H), 1.40 (s, 6 H), 1.38 (s, 6 H), 1.09 (d, *J* 14.0, 2 H) ppm; 13C NMR (C6D6, 75 MHz):  205.8, 120.9, 97.8, 69.1, 68.7, 43.5, 36.1, 35.0, 24.9, 23.1 ppm; HRMS calcd for (M)+ *m*/*z* 414.2042, found *m*/*z* 414.2047.

**Compound 7B.** 1H NMR (C6D6, 500 MHz):  5.30 (s, 2 H), 4.14 (m, 2 H), 4.07 (m, 2 H), 3.84 (m, 4 H), 3.84 (d, *J* 17. 0, 2 H), 3.03 (d, *J* 17.0, 2 H), 2.81 (d, *J* 14.0, 2 H), 2.75 (d, *J* 14.0, 2 H), 1.01 (t, *J* 7.1, 6 H), 0.85 (t, *J* 7.1, 6 H) ppm; 13C NMR (C6D6, 75 MHz):  204.7, 180.5, 171.4, 169.6, 120.9, 69.1, 62.1, 62.0, 61.5, 37.1, 14.0, 13.9 ppm; HRMS calcd for (M)+ *m*/*z* 502.1839, found *m*/*z* 502.1842.
